# Supplementary material for: Prevalence of Depression in Coronary Artery Bypass Surgery: A Systematic Review and Meta-Analysis
Source: MDPI journal article supplement (doi:10.3390/jcm9040909), 2020-03-26
Supplement: s1 [file s1]

**Table S1.** Depression Assessment Instruments Used by the 65 Studies Included in the Systematic Review

| Depression instrument                                                      | Studies | Range score | Score                                                                                                                                     |
|----------------------------------------------------------------------------|---------|-------------|-------------------------------------------------------------------------------------------------------------------------------------------|
| Beck Depression Inventory (BDI) [9]                                        | N = 17  | 0–63        | 0–9: normal<br>10–16: mild depression<br>17–29: moderate depression<br>30–63: severe depression<br>Cut-off score for depression $\geq 10$ |
| Cardiac Depression Scale (CDS) [110]                                       | N = 2   | 26–182      | Higher scores indicate higher depression levels                                                                                           |
| Center for Epidemiological Studies Depression Scale (CES-D) [111]          | N = 4   | 0–60        | <16: normal<br>16–26: mild depression<br>$\geq 27$ : severe depression<br>Cut-off score for depression $> 16$                             |
| Cardiac Symptom Survey (CSS) [112]                                         | N = 3   | 0–10        | Higher scores indicate higher depression levels                                                                                           |
| Depression, Anxiety, Stress Scale (DASS) (depression subscale) [113]       | N = 3   | 0–42        | 0–9: normal<br>10–13: mild<br>14–20: moderate<br>21–27: severe<br>>28: extremely severe                                                   |
| Depression scales of the Cognitive Behavioural Assessment (CBA 2.0-D)[114] | N = 1   | -           | Higher scores indicate higher depression levels                                                                                           |
| Geriatric Depression Scale (GDS) [115]                                     | N = 2   | 0–30        | 0–9: normal<br>10–19: mild depression<br>20–30: severe depression                                                                         |
| Hamilton Rating Scale for Depression (HAM-D)[116]                          | N = 4   | 0–52        | 0–7: normal<br>8–16: mild depression<br>17–23: moderate depression<br>>24: severe depression                                              |

|                                                                         |        |       |                                                                                                                               |
|-------------------------------------------------------------------------|--------|-------|-------------------------------------------------------------------------------------------------------------------------------|
| Hospital Anxiety and Depression Scale (HADS) (depression subscale) [10] | N = 18 | 0–21  | 0–7: normal<br>8–10: mild<br>11–14: moderate<br>15–21: severe<br>Cut-off score for depression $\geq 8$                        |
| Multiple Affect Adjective Checklist Depression Scale (MAACL)[117]       | N = 1  | 0–40  | Higher scores indicate higher depression levels                                                                               |
| Patient Health Questionnaire (PHQ-2) [118]                              | N = 1  | 0–6   | Higher scores indicate higher depression levels                                                                               |
| Patient Health Questionnaire 9-item (PHQ-9) [119]                       | N = 9  | 0–27  | 0–4: minimal<br>5–9: mild<br>10–14: moderate<br>15–19: moderate-severe<br>20–27: severe<br>Cut-off score for depression $>10$ |
| Profile of Mood States Depression Scale (POMS-D) [120]                  | N = 1  | 0–60  | Higher scores indicate higher depression levels                                                                               |
| Self-rating Depression Scale (SDS) [121]                                | N = 1  | 20–80 | 25–49: normal<br>50–59: mild depression<br>60–69: moderate depression<br>$>70$ : severe depression                            |
| Symptom Checklist-90 Revised (SCL-90R) [122]                            | N = 2  | -     | Higher scores indicate higher depression levels                                                                               |
